# Supplementary material for: Rapid Molecular Diagnostic Sensor Based on Ball-Lensed Optical Fibers
Source: MDPI journal article supplement (doi:10.3390/bios11040125), 2021-04-15
Supplement: s1 [file s1]

Supplementary

# Rapid Molecular Diagnostic Sensor Based on Ball-Lensed Optical Fibers

Byungjun Park <sup>1,2,†</sup>, Bonhan Koo <sup>3,4,†</sup>, Jisub Kim <sup>1</sup>, Kiri Lee <sup>1</sup>, Hyeonjin Bang <sup>1</sup>, Sung-Han Kim <sup>4</sup>, Kyung Young Jhang <sup>2,\*</sup>, Yong Shin <sup>5,\*</sup> and Seungrag Lee <sup>1,\*</sup>

- <sup>1</sup> Medical Device Development Center, Osong Medical Innovation Foundation, 123 Osongsaengmyung-ro, Heungdeok-gu, 28160 Cheongju-si, Korea; yachon@kbiohealth.kr (B.P.); jiseob@intekmedi.co.kr (J.K.); krlee@kbiohealth.kr (K.L.); crisenc@kbiohealth.kr (H.B.)
- <sup>2</sup> School of Mechanical Engineering, Hanyang University, 222 Wangsimni-ro, Seongdong-gu, , Korea
- <sup>3</sup> Department of Convergence Medicine, Asan Medical Institute of Convergence Science and Technology, Asan Medical Center, University of Ulsan College of Medicine, 88 Olympic-ro-43gil, Songpa-gu, Korea; qhsgksdl@ulsan.ac.kr
- <sup>4</sup> Department of Infectious Diseases, Asan Medical Center, University of Ulsan College of Medicine, 88 Olympic-ro-43gil, Songpa-gu, Korea; shkimmd@amc.seoul.kr
- <sup>5</sup> Department of Biotechnology, College of Life Science and Biotechnology, Yonsei University, 50 Yonsei Ro, Seodaemun Gu, 03722, Korea
- \* Correspondence: kyjhang@hanyang.ac.kr (K.Y.J.); shinyongno1@yonsei.ac.kr (Y.S.); naviman78@kbiohealth.kr (S.L.)
- † These authors contributed equally to the work.

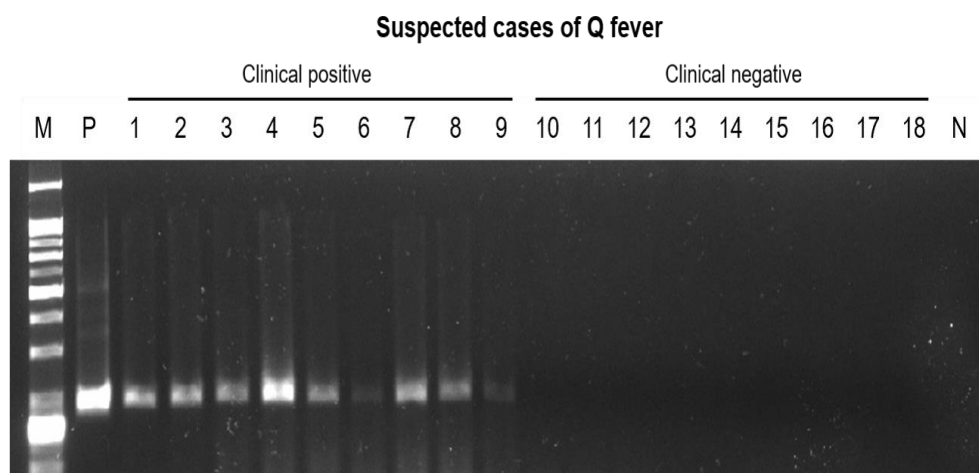

\* IS1111a; *C. burnetii* transposase (IS1111a) gene, complete cds (NCBI Nr. M8806)

**Figure S1.** Gel electrophoresis results for the detection of *Coxiella burnetii* DNA in clinical specimens from patients with Q fever, using end-point PCR. (M: DNA marker; P: Positive template; 1–9: Q-fever-positive clinical specimens; 10–18: Q-fever-negative clinical specimens; N: Negative control).

**Table S1.** Primer sequences used for the amplification of *Coxiella burnetii* DNA.

| <i>C.burnetii</i> | Primer                  |         | Sequence (5′ – 3′ )                                                                    |
|-------------------|-------------------------|---------|----------------------------------------------------------------------------------------|
| IS1111a           | Conventional assay      | Forward | GAGCGAACCATTGGTATCG                                                                    |
|                   |                         | Reverse | CTTTAACAGCGCTTGAACGT                                                                   |
|                   | BLOF bio-optical sensor | Forward | NH <sub>2</sub> -(CH <sub>2</sub> ) <sub>12</sub> -GAGCGAACCATTGGTATCGGACGTTTATGGGGATG |
|                   |                         | Reverse | GTATCTTTAACAGCGCTTGAACGTCTTGTG                                                         |

IS1111a; *C. burnetii* transposase (IS1111a) gene, complete cds (NCBI Nr. M8806)

**Table S2.** Simulation conditions of the ball-lensed optical fiber (BLOF) with Zemax software.

|                                | Items                 | Specifications              |
|--------------------------------|-----------------------|-----------------------------|
| <b>Coreless fiber (CLF)</b>    | Coreless fiber length | 285 $\mu\text{m}$           |
|                                | Ball diameter         | 300 $\mu\text{m}$           |
|                                | Cladding diameter     | 125 $\mu\text{m}$           |
| <b>Polarization fiber (PM)</b> | Core diameter         | 8.5 $\mu\text{m}$           |
|                                | Cladding diameter     | 125 $\mu\text{m}$           |
|                                | Mode field diameter   | 10 $\mu\text{m}$ (@1550 nm) |
|                                | Numerical aperture    | 0.125                       |
| <b>Optical Source</b>          | Wavelength            | 1550 nm                     |
